# Supplementary material
Source: ML conference proceedings conference paper supplement (https://openreview.net/forum?id=TjP1d8PP8l)

Easy Tasks

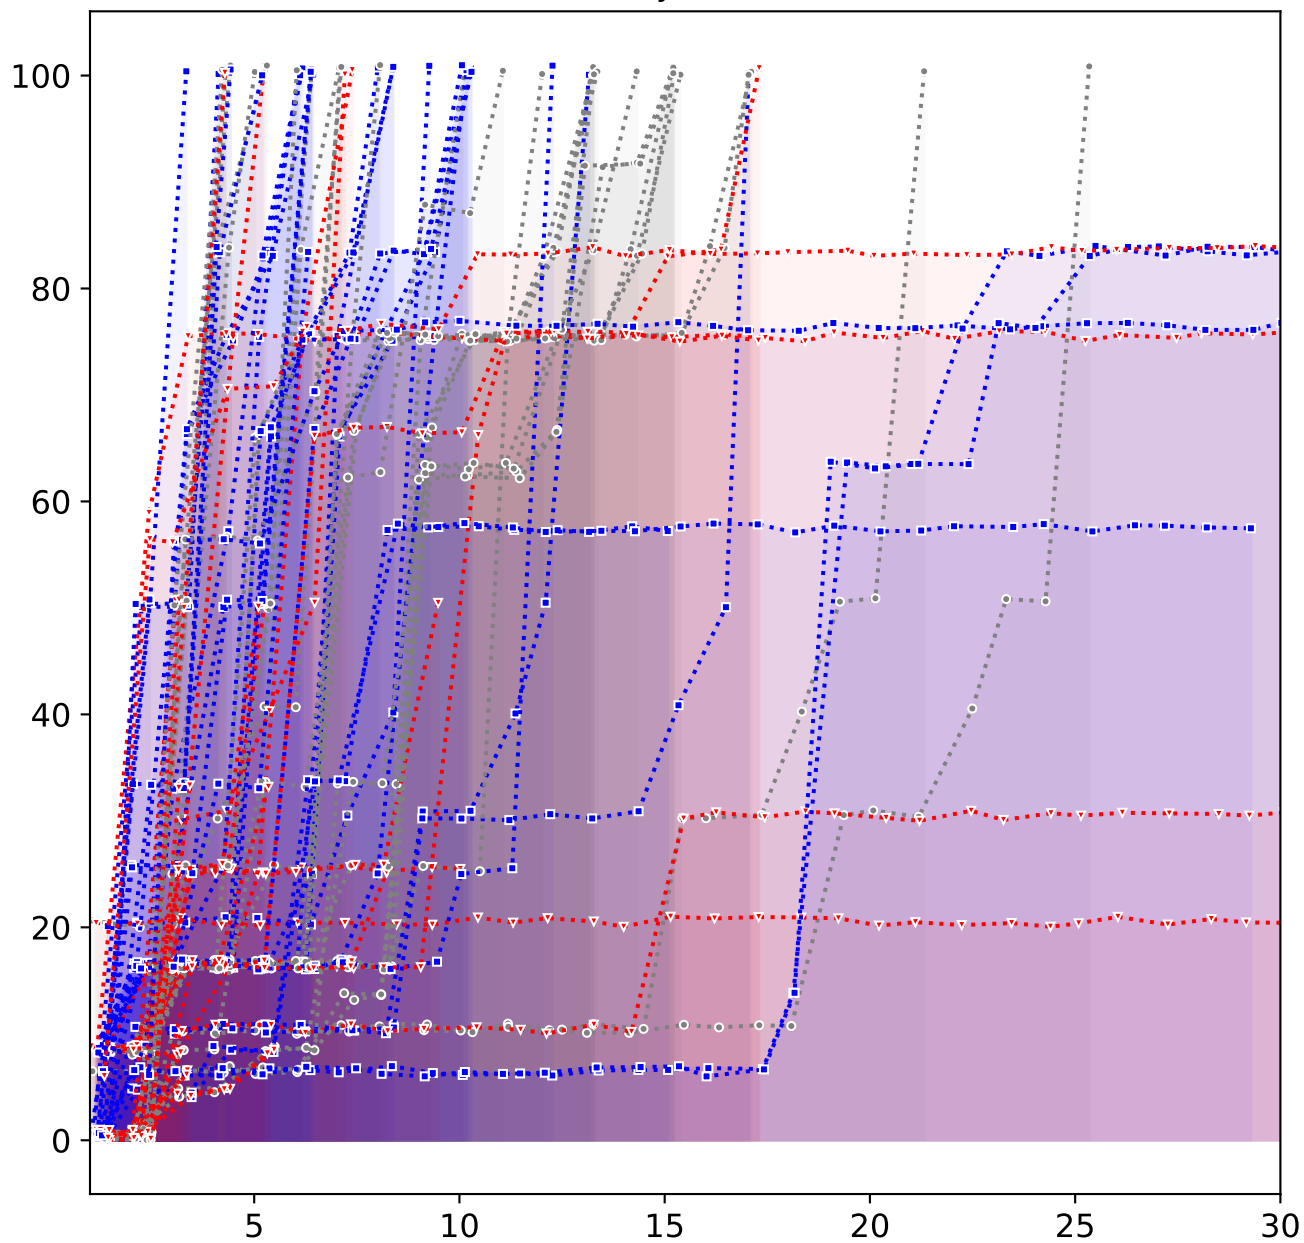

Supplement: supplementary_material [file attachment]

Medium Tasks

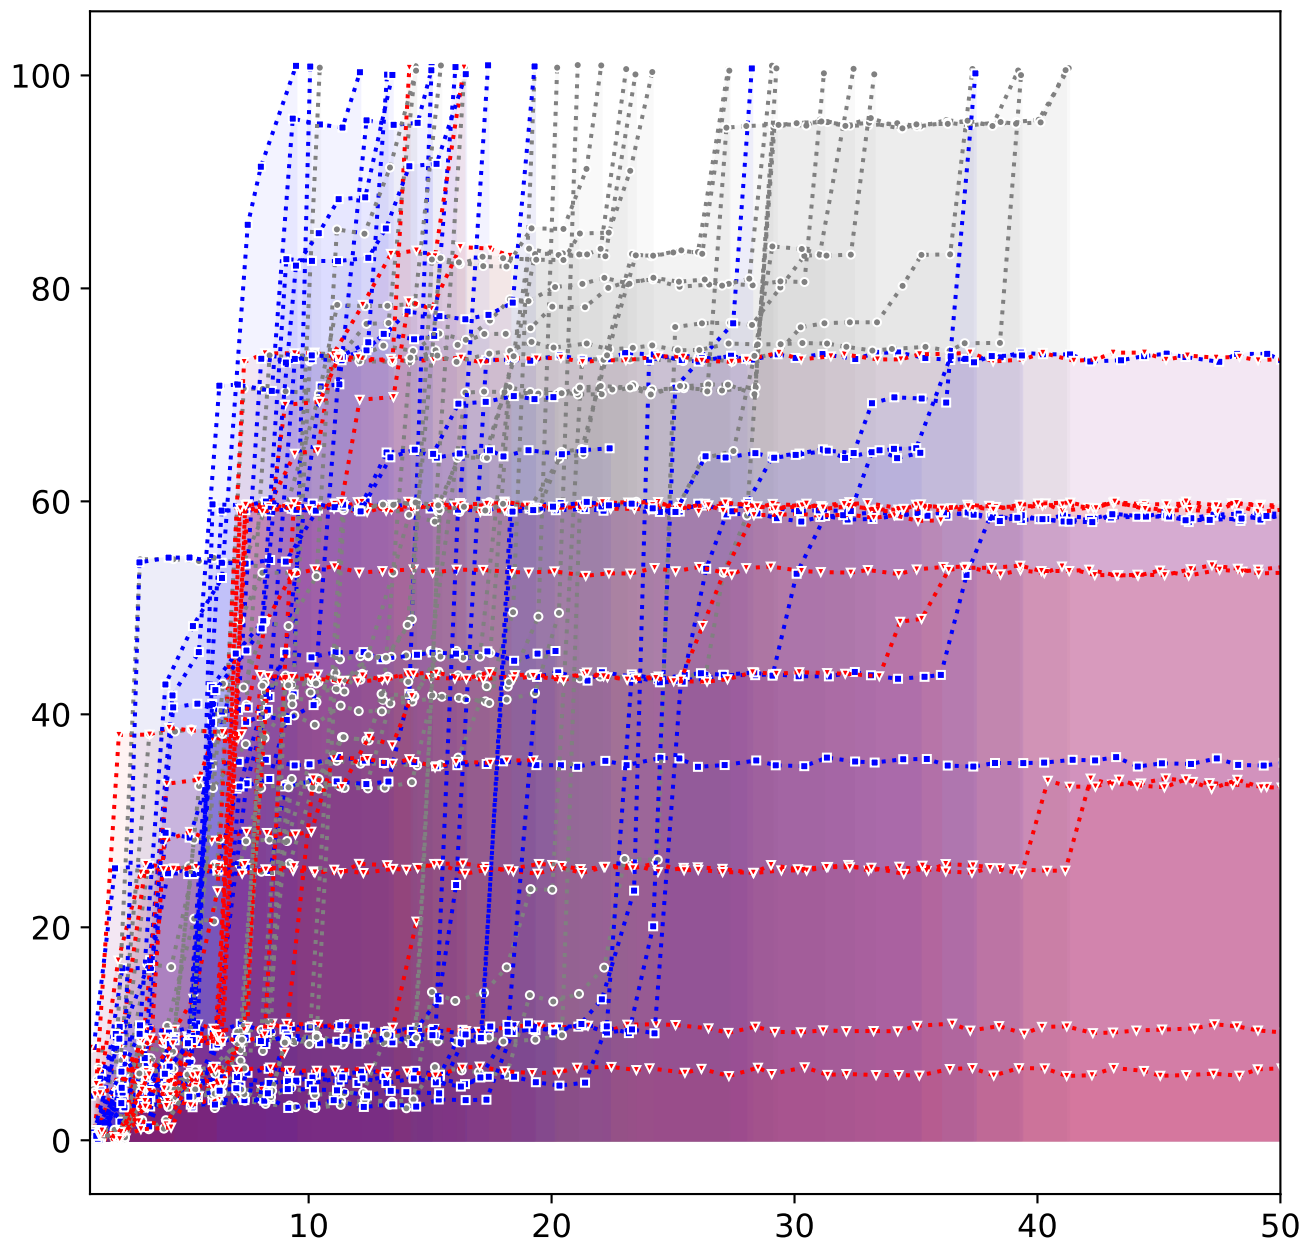

Supplement: supplementary_material [file attachment]

# Hard Tasks

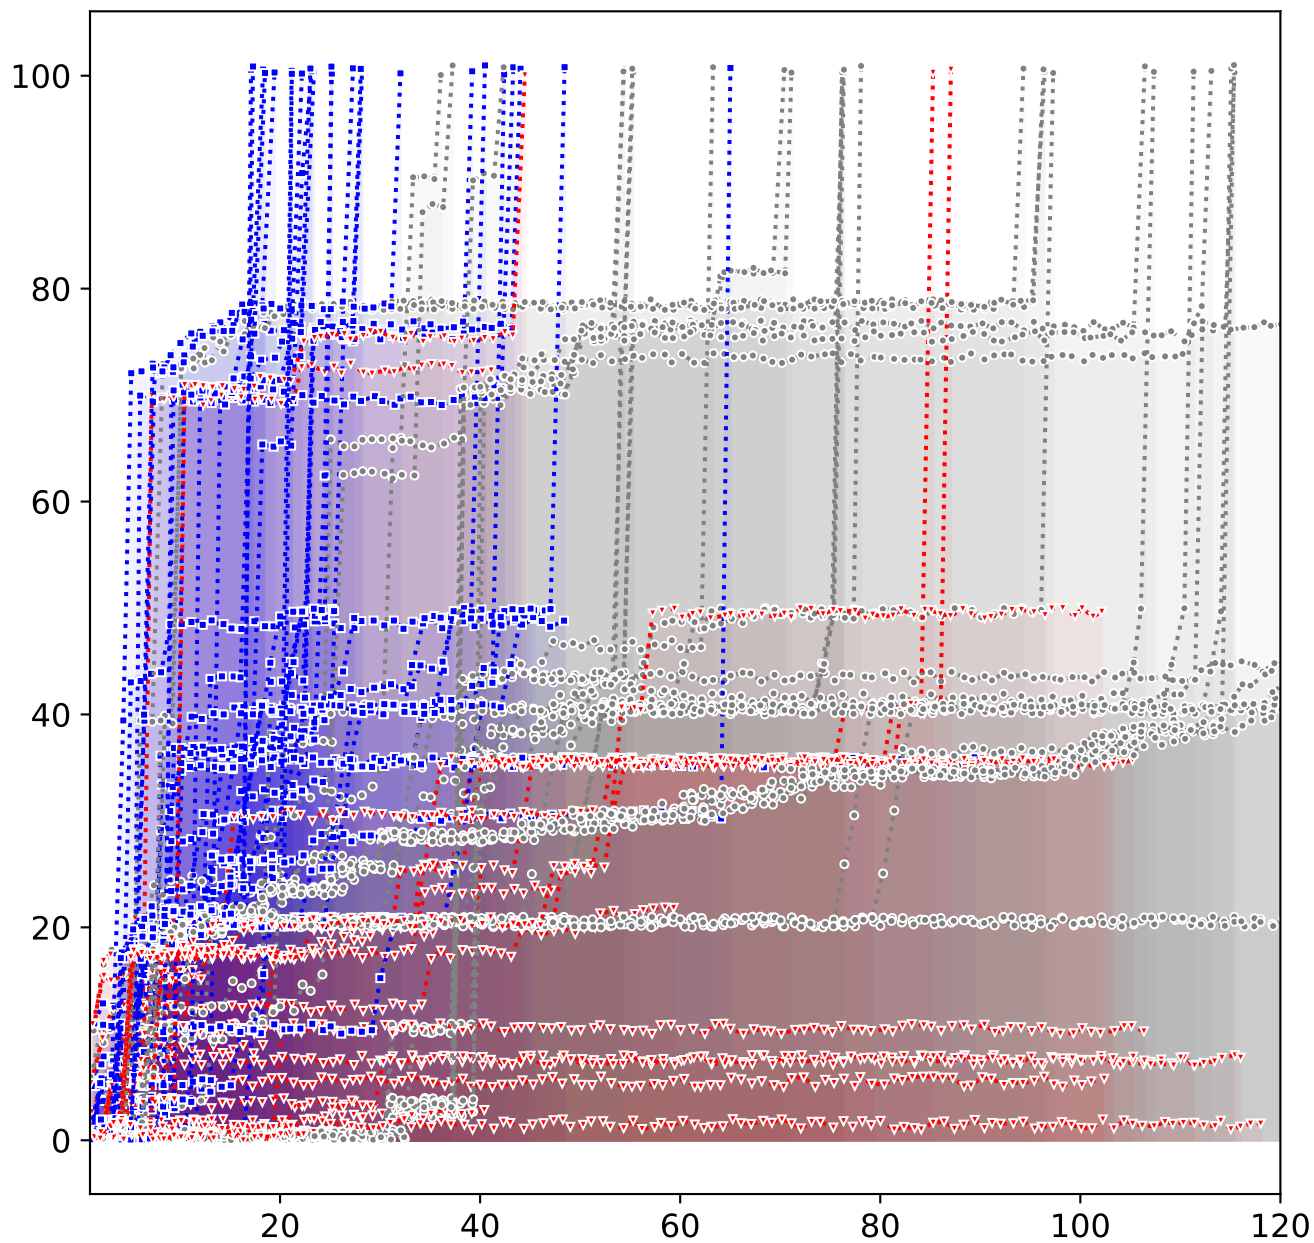

Supplement: supplementary_material [file attachment]
